# Supplementary material for: Pre-Surgery Depression and Confidence to Manage Problems Predict Recovery Trajectories of Health and Wellbeing in the First Two Years following Colorectal Cancer: Results from the CREW Cohort Study
Source: PubMed Central journal article supplement (PMC4865190; doi:10.1371/journal.pone.0155434), 2016-05-12
Supplement: pone.0155434.s001.pdf [file pone.0155434.s001.pdf]

**S1 Figure:** Self-efficacy for Managing Chronic Disease 6-item Scale (Lorig *et al* 2001)

- |                                                                                                                                                               |                                                                                    |
|---------------------------------------------------------------------------------------------------------------------------------------------------------------|------------------------------------------------------------------------------------|
| 1. How confident are you that you can keep the fatigue caused by your disease from interfering with the things you want to do?                                | Not at all                     Totally<br>confident 1 2 3 4 5 6 7 8 9 10 confident |
| 2. How confident are you that you can keep the physical discomfort or pain of your disease from interfering with the things you want to do?                   | Not at all                     Totally<br>confident 1 2 3 4 5 6 7 8 9 10 confident |
| 3. How confident are you that you can keep the emotional distress caused by your disease from interfering with the things you want to do?                     | Not at all                     Totally<br>confident 1 2 3 4 5 6 7 8 9 10 confident |
| 4. How confident are you that you can keep any other symptoms or health problems you have from interfering with the things you want to do?                    | Not at all                     Totally<br>confident 1 2 3 4 5 6 7 8 9 10 confident |
| 5. How confident are you that you can do the different tasks and activities needed to manage your health condition so as to reduce your need to see a doctor? | Not at all                     Totally<br>confident 1 2 3 4 5 6 7 8 9 10 confident |
| 6. How confident are you that you can do things other than just taking medication to reduce how much your illness affects your everyday life?                 | Not at all                     Totally<br>confident 1 2 3 4 5 6 7 8 9 10 confident |
