# Supplementary material for: Pre-Surgery Depression and Confidence to Manage Problems Predict Recovery Trajectories of Health and Wellbeing in the First Two Years following Colorectal Cancer: Results from the CREW Cohort Study
Source: PubMed Central journal article supplement (PMC4865190; doi:10.1371/journal.pone.0155434), 2016-05-12
Supplement: pone.0155434.s002.pdf [file pone.0155434.s002.pdf]

**S1 Table: Further results from trajectory models: criteria used to determine appropriate number of trajectories for each outcome**

| Outcome and number of groups    | Bayesian Information Criterion (BIC) | Null model for comparison (simpler model with 1 less group) | Change in BIC | Estimated % in smallest group |
|---------------------------------|--------------------------------------|-------------------------------------------------------------|---------------|-------------------------------|
| <b>QLACS-GSS</b>                |                                      |                                                             |               |                               |
| 1                               | -13230.49                            | 0                                                           |               |                               |
| 2                               | -12660.31                            | 1                                                           | 570.18        | 35.8%                         |
| 3                               | -12459.04                            | 2                                                           | 201.27        | 13.1%                         |
| <b>4</b>                        | <b>-12346.46</b>                     | <b>3</b>                                                    | <b>112.58</b> | <b>5.3%</b>                   |
| 5                               | -12326.90                            | 4                                                           | 19.56         | 2.4%                          |
| 6                               | -12323.12                            | 5                                                           | 3.78          | 2.1%                          |
| <b>EQ-5D utility index</b>      |                                      |                                                             |               |                               |
| 1                               | -1108.27                             | 0                                                           |               |                               |
| 2                               | -887.93                              | 1                                                           | 220.34        | 40.1%                         |
| 3                               | -813.95                              | 2                                                           | 73.98         | 8.5%                          |
| <b>4</b>                        | <b>-788.31</b>                       | <b>3</b>                                                    | <b>25.64</b>  | <b>7.4%</b>                   |
| 5                               | -781.13                              | 4                                                           | 7.18          | 3.9%                          |
| 6                               | -784.70                              | 5                                                           | -3.57         | 3.2%                          |
| <b>Personal Wellbeing Index</b> |                                      |                                                             |               |                               |
| 1                               | -12661.28                            | 0                                                           |               |                               |
| 2                               | -12143.80                            | 1                                                           | 517.48        | 29.3%                         |
| 3                               | -11982.36                            | 2                                                           | 161.44        | 9.0%                          |
| <b>4</b>                        | <b>-11928.78</b>                     | <b>3</b>                                                    | <b>53.58</b>  | <b>4.2%</b>                   |
| 5                               | -11917.15                            | 4                                                           | 11.63         | 3.4%                          |
| 6                               | -11940.61                            | 5                                                           | -23.46        | 2.9%                          |

**Final selected models are highlighted in bold**
