# Supplementary material for: Pre-Surgery Depression and Confidence to Manage Problems Predict Recovery Trajectories of Health and Wellbeing in the First Two Years following Colorectal Cancer: Results from the CREW Cohort Study
Source: PubMed Central journal article supplement (PMC4865190; doi:10.1371/journal.pone.0155434), 2016-05-12
Supplement: pone.0155434.s003.pdf [file pone.0155434.s003.pdf]

**S2 Table: Frequencies of baseline socio-demographic, clinical, treatment and psycho-social characteristics according to estimated trajectories for QLACS-GSS, EQ-5D and PWI**

| %s (unless otherwise indicated)                             | QLACS-Generic Summary Score trajectories |                             |                                         |                         | EQ-5D utility index trajectories |                                                     |                                            |                            | PWI trajectories                |                                                         |                                             |                                                 |
|-------------------------------------------------------------|------------------------------------------|-----------------------------|-----------------------------------------|-------------------------|----------------------------------|-----------------------------------------------------|--------------------------------------------|----------------------------|---------------------------------|---------------------------------------------------------|---------------------------------------------|-------------------------------------------------|
|                                                             | Good QoL (Group 1) N=227                 | Average QoL (Group 2) N=318 | Worse QoL in short-term (Group 3) N=183 | Poor QoL (Group 4) N=40 | Good health (Group 1) N=141      | Good health, declining in long-term (Group 2) N=122 | Consistent health problems (Group 3) N=480 | Poor health (Group 4) N=54 | Good well-being (Group 1) N=365 | Wellbeing declining within normal range (Group 2) N=253 | Poor & declining well-being (Group 3) N=147 | Very poor & declining well-being (Group 4) N=32 |
| <b>Age</b><br>Mean (SD)                                     | 67.7<br>(8.7)                            | 69.1<br>(10.1)              | 66.5<br>(11.1)                          | 65.2<br>(12.1)          | 66.8<br>(9.1)                    | 68.1<br>(9.6)                                       | 68.7<br>(10.4)                             | 68.3<br>(13.0)             | 69.2<br>(9.6)                   | 67.5<br>(10.3)                                          | 67.5<br>(11.1)                              | 64.0<br>(11.5)                                  |
| <b>Gender</b>                                               |                                          |                             |                                         |                         |                                  |                                                     |                                            |                            |                                 |                                                         |                                             |                                                 |
| Male                                                        | 67.0                                     | 62.0                        | 53.5                                    | 62.5                    | 63.1                             | 70.5                                                | 55.4                                       | 63.0                       | 64.4                            | 58.9                                                    | 49.0                                        | 59.0                                            |
| Female                                                      | 33.0                                     | 38.0                        | 46.5                                    | 37.5                    | 36.9                             | 29.5                                                | 44.6                                       | 37.0                       | 35.6                            | 41.1                                                    | 51.0                                        | 41.0                                            |
| <b>Deprivation quintile</b>                                 |                                          |                             |                                         |                         |                                  |                                                     |                                            |                            |                                 |                                                         |                                             |                                                 |
| 1 <sup>st</sup> (least deprived)                            | 26.1                                     | 20.4                        | 14.4                                    | 12.5                    | 22.4                             | 30.3                                                | 18.8                                       | 7.7                        | 23.9                            | 20.6                                                    | 14.5                                        | 3.1                                             |
| 2 <sup>nd</sup>                                             | 22.5                                     | 22.0                        | 18.2                                    | 12.5                    | 25.4                             | 18.8                                                | 21.6                                       | 7.7                        | 22.3                            | 17.7                                                    | 20.7                                        | 25.0                                            |
| 3 <sup>rd</sup>                                             | 18.9                                     | 19.1                        | 21.0                                    | 20.0                    | 15.7                             | 20.5                                                | 20.3                                       | 21.1                       | 19.4                            | 22.6                                                    | 15.9                                        | 15.6                                            |
| 4 <sup>th</sup>                                             | 15.8                                     | 19.4                        | 19.9                                    | 22.5                    | 20.9                             | 12.3                                                | 19.2                                       | 23.1                       | 17.8                            | 16.1                                                    | 24.1                                        | 25.0                                            |
| 5 <sup>th</sup> (most deprived)                             | 16.7                                     | 19.1                        | 26.5                                    | 32.5                    | 15.7                             | 18.0                                                | 20.1                                       | 40.4                       | 16.6                            | 23.0                                                    | 24.8                                        | 31.3                                            |
| <b>Live alone</b>                                           |                                          |                             |                                         |                         |                                  |                                                     |                                            |                            |                                 |                                                         |                                             |                                                 |
| No                                                          | 83.1                                     | 78.0                        | 77.1                                    | 75.9                    | 78.9                             | 77.2                                                | 78.3                                       | 77.5                       | 88.4                            | 74.1                                                    | 67.5                                        | 50.0                                            |
| Yes                                                         | 16.9                                     | 22.0                        | 22.9                                    | 24.1                    | 21.1                             | 22.8                                                | 21.7                                       | 22.5                       | 11.6                            | 25.9                                                    | 32.5                                        | 50.0                                            |
| <b>Number of comorbidities</b>                              |                                          |                             |                                         |                         |                                  |                                                     |                                            |                            |                                 |                                                         |                                             |                                                 |
| 0                                                           | 34.9                                     | 28.4                        | 19.2                                    | 10.0                    | 38.3                             | 44.1                                                | 22.9                                       | 2.4                        | 33.1                            | 23.0                                                    | 22.3                                        | 20.0                                            |
| 1                                                           | 35.9                                     | 30.7                        | 32.7                                    | 30.0                    | 34.4                             | 35.3                                                | 29.9                                       | 35.7                       | 31.0                            | 34.6                                                    | 28.9                                        | 40.0                                            |
| 2                                                           | 19.0                                     | 24.5                        | 23.1                                    | 26.7                    | 16.4                             | 15.7                                                | 26.3                                       | 23.8                       | 20.9                            | 24.9                                                    | 24.0                                        | 24.0                                            |
| ≥3                                                          | 10.3                                     | 16.3                        | 25.0                                    | 33.3                    | 10.9                             | 4.9                                                 | 20.8                                       | 38.1                       | 15.0                            | 17.5                                                    | 24.8                                        | 16.0                                            |
| <b>Tumour site</b>                                          |                                          |                             |                                         |                         |                                  |                                                     |                                            |                            |                                 |                                                         |                                             |                                                 |
| Colon                                                       | 70.9                                     | 61.2                        | 63.7                                    | 56.4                    | 67.4                             | 66.4                                                | 63.9                                       | 51.8                       | 64.6                            | 67.5                                                    | 60.3                                        | 46.9                                            |
| Rectal                                                      | 29.1                                     | 38.8                        | 36.3                                    | 43.6                    | 32.6                             | 33.6                                                | 36.1                                       | 48.2                       | 35.4                            | 32.5                                                    | 39.7                                        | 53.1                                            |
| <b>Dukes stage</b>                                          |                                          |                             |                                         |                         |                                  |                                                     |                                            |                            |                                 |                                                         |                                             |                                                 |
| A                                                           | 18.2                                     | 13.7                        | 13.3                                    | 10.3                    | 15.9                             | 13.1                                                | 15.3                                       | 7.6                        | 17.3                            | 13.2                                                    | 9.7                                         | 22.6                                            |
| B                                                           | 55.6                                     | 55.3                        | 52.2                                    | 56.4                    | 55.8                             | 62.3                                                | 52.4                                       | 52.8                       | 55.9                            | 50.0                                                    | 58.6                                        | 54.8                                            |
| C1                                                          | 16.0                                     | 21.7                        | 21.1                                    | 15.4                    | 21.0                             | 15.6                                                | 20.6                                       | 20.7                       | 17.6                            | 23.6                                                    | 20.7                                        | 12.9                                            |
| C2                                                          | 10.2                                     | 9.3                         | 13.3                                    | 17.9                    | 7.2                              | 9.0                                                 | 11.7                                       | 18.9                       | 9.2                             | 13.2                                                    | 11.0                                        | 9.7                                             |
| <b>Stoma</b>                                                |                                          |                             |                                         |                         |                                  |                                                     |                                            |                            |                                 |                                                         |                                             |                                                 |
| No                                                          | 73.8                                     | 62.4                        | 55.6                                    | 56.4                    | 70.7                             | 72.3                                                | 62.1                                       | 40.7                       | 67.4                            | 64.5                                                    | 55.9                                        | 50.0                                            |
| Yes                                                         | 26.2                                     | 37.6                        | 44.4                                    | 43.6                    | 29.3                             | 27.7                                                | 37.9                                       | 59.3                       | 32.6                            | 35.5                                                    | 44.1                                        | 50.0                                            |
| <b>Neo-adjuvant treatment</b>                               |                                          |                             |                                         |                         |                                  |                                                     |                                            |                            |                                 |                                                         |                                             |                                                 |
| No                                                          | 83.6                                     | 83.2                        | 76.8                                    | 74.4                    | 86.5                             | 83.5                                                | 79.7                                       | 70.4                       | 82.0                            | 82.4                                                    | 76.0                                        | 75.0                                            |
| Yes                                                         | 16.4                                     | 16.8                        | 23.2                                    | 25.6                    | 13.5                             | 16.5                                                | 20.3                                       | 29.6                       | 18.0                            | 17.6                                                    | 24.0                                        | 25.0                                            |
| <b>Adjuvant treatment</b>                                   |                                          |                             |                                         |                         |                                  |                                                     |                                            |                            |                                 |                                                         |                                             |                                                 |
| No                                                          | 66.5                                     | 68.1                        | 60.4                                    | 59.0                    | 73.0                             | 64.7                                                | 64.1                                       | 63.0                       | 69.2                            | 63.5                                                    | 61.0                                        | 59.4                                            |
| Yes                                                         | 33.5                                     | 31.9                        | 39.6                                    | 41.0                    | 27.0                             | 35.3                                                | 35.9                                       | 37.0                       | 30.8                            | 36.5                                                    | 39.0                                        | 40.6                                            |
| <b>Self-efficacy<sup>1</sup> (Lorig) at baseline</b>        | 8.8<br>(1.1)                             | 7.5<br>(1.6)                | 6.4<br>(1.7)                            | 4.3<br>(1.9)            | 8.2<br>(1.4)                     | 8.7<br>(1.1)                                        | 7.1<br>(1.8)                               | 5.3<br>(2.1)               | 8.4<br>(1.4)                    | 7.2<br>(1.7)                                            | 6.0<br>(1.9)                                | 5.2<br>(1.8)                                    |
| <b>Overall social support<sup>1</sup> (MOS) at baseline</b> | 88.0<br>(17.6)                           | 81.2<br>(19.8)              | 75.5<br>(22.3)                          | 64.8<br>(21.8)          | 83.9<br>(20.7)                   | 84.7<br>(17.5)                                      | 79.9<br>(20.7)                             | 75.1<br>(25.2)             | 87.8<br>(18.3)                  | 80.3<br>(17.2)                                          | 70.5<br>(19.9)                              | 51.1<br>(28.0)                                  |
| <b>Anxiety<sup>2</sup> (STAI) at baseline</b>               |                                          |                             |                                         |                         |                                  |                                                     |                                            |                            |                                 |                                                         |                                             |                                                 |
| < 40                                                        | 85.2                                     | 63.3                        | 36.3                                    | 5.7                     | 71.0                             | 86.2                                                | 54.9                                       | 25.5                       | 74.6                            | 57.1                                                    | 35.4                                        | 29.6                                            |
| ≥ 40 (case)                                                 | 14.8                                     | 36.7                        | 63.7                                    | 94.3                    | 29.0                             | 13.8                                                | 45.1                                       | 74.5                       | 25.4                            | 42.9                                                    | 64.6                                        | 70.4                                            |
| <b>Depression<sup>2</sup> (CES-D) at baseline</b>           |                                          |                             |                                         |                         |                                  |                                                     |                                            |                            |                                 |                                                         |                                             |                                                 |
| < 20                                                        | 97.2                                     | 87.6                        | 54.1                                    | 22.9                    | 87.9                             | 94.4                                                | 76.7                                       | 34.0                       | 90.5                            | 80.3                                                    | 55.8                                        | 18.5                                            |
| ≥ 20 (case)                                                 | 2.8                                      | 12.4                        | 45.9                                    | 77.1                    | 12.1                             | 5.6                                                 | 23.3                                       | 66.0                       | 9.5                             | 19.7                                                    | 44.2                                        | 81.5                                            |

<sup>1</sup> Higher scores for self-efficacy and social support indicate *better* levels; <sup>2</sup> Cut-off for STAI  $\geq 40$  indicates clinically significant anxiety and  $\geq 20$  for CES-D indicates clinical depression (major and minor)
